# Supplementary material
Source: ML conference proceedings conference paper supplement (https://openreview.net/forum?id=tXc-riXhmx)
Supplement: supplementary_material [file attachment]

# SUPPLEMENTARY MATERIAL FOR REVISIT FINETUNING STRATEGY FOR FEW-SHOT LEARNING TO STRENGTHEN THE EQUIVARIANCE OF EMDEDDINGS

**Anonymous authors**

Paper under double-blind review

## ABSTRACT

In this supplementary material, 1) we present the gradients of Firth Bias Reduction loss to analyze its effectiveness; 2) the analytic formulation of LP-FT-FB's gradients is presented for understanding; 3) the whole flow of the proposed LP-FT-FB is given; 4) the ablation study is given to show the effectiveness of the proposed i-FBR; 5) the related meta-learning-based works are given.

## A THE DERIVATION OF FIRTH BIAS REDUCTION LOSS

The derivative of FBR with respect to  $r_i^k$  is given. Here  $r_i^k = \beta_k \cdot \mathbf{B}(\mathbf{x}_i, \theta)$ .  $i$  is the index of sample number ( $1 \leq i \leq M$ ) and  $k$  is the index of class number ( $1 \leq k \leq C$ ).

$$\begin{aligned} \frac{\partial \mathcal{L}}{\partial r_i^k} &= \frac{\partial \mathcal{L}_{CE}}{\partial r_i^k} + \frac{\partial \mathcal{L}_{Firth}}{\partial r_i^k} \\ &= \frac{1}{M} \sum_{i=1}^M \sum_{k=1}^C \left[ (p_i^k - y_i^k) + \frac{\partial \mathcal{L}_{Firth}}{\partial \mathbf{P}_i} \cdot \frac{\partial \mathbf{P}_i}{\partial r_i^k} \right], \end{aligned} \quad (1)$$

where  $\frac{\partial \mathcal{L}_{CE}}{\partial r_i^k}$  is the typical gradient of the cross entropy loss and  $y_i^k$  is  $k_{th}$  element of  $i_{th}$  sample label  $\mathbf{y}_i$  (defined in Section 3.1).  $\mathbf{P} = \{\mathbf{P}_i\}_{i=1}^M$  and  $\mathbf{P}_i = \{p_i^k\}_{k=1}^C$ . Then we give the loss of  $i_{th}$  sample and its gradients with respect to  $r_i^k$ . Firstly, the analytic formula of Firth loss of  $i_{th}$  sample is

$$\begin{aligned} \mathcal{L}_{Firth} &= -\frac{1}{M} \sum_{i=1}^M [\lambda \cdot D_{KL}(\mathbf{U}_{[0,C]} \parallel \mathbf{P}_i)] \\ &= -\frac{1}{M} \sum_{i=1}^M \left[ \frac{\lambda}{(C+1)} \cdot \left( \log \frac{1}{C+1} + \log \mathbf{P}_i \right) \right]. \end{aligned} \quad (2)$$

Secondly, we have  $p_i^k = \frac{e^{r_i^k}}{1 + \sum_{j=1}^C e^{r_i^j}}$ . The gradient of logistic regression is

$$\frac{p_i^k}{r_i^j} = \begin{cases} -p_i^k \cdot p_i^j, & k \neq j \\ p_i^k - p_i^k \cdot p_i^j, & k = j \end{cases}. \quad (3)$$

With Eq. 3, the gradients of  $\mathcal{L}_{Firth}$  with respect to  $r_i^k$  is derivated as follows.

$$\begin{aligned}
\frac{\partial \mathcal{L}_{Firth}}{\partial \mathbf{P}_i} \cdot \frac{\partial \mathbf{P}_i}{\partial r_i^k} &= \frac{1}{M} \sum_{i=1}^M \sum_{k=1}^C -\frac{\lambda}{(C+1)} \cdot \frac{\partial(\log \mathbf{P}_i)}{\partial \mathbf{P}_i} \cdot \frac{\partial \mathbf{P}_i}{\partial r_i^k} \\
&= \frac{1}{M} \sum_{i=1}^M \sum_{k=1}^C -\frac{\lambda}{(C+1)} \cdot \frac{1}{\mathbf{P}_i} \cdot \left\{ \frac{\partial p_i^k}{\partial r_i^k}, \left\{ \frac{\partial p_i^j}{\partial r_i^k} \right\}_{j=1, j \neq k}^C \right\} \\
&= \frac{1}{M} \sum_{i=1}^M \sum_{k=1}^C -\frac{\lambda}{(C+1)} \cdot \frac{1}{\mathbf{P}_i} \cdot \left\{ p_i^k(1-p_i^k), \{-p_i^k \cdot p_i^j\}_{j=1, j \neq k}^C \right\}, \quad (4) \\
&= \frac{1}{M} \sum_{i=1}^M \sum_{k=1}^C -\frac{\lambda}{(C+1)} \cdot \frac{p_i^k}{\mathbf{P}_i} \cdot \left\{ 1-p_i^k, \{-p_i^j\}_{j=1, j \neq k}^C \right\} \\
&= \frac{1}{M} \sum_{i=1}^M \sum_{k=1}^C -\frac{\lambda}{(C+1)} \cdot \frac{p_i^k}{\mathbf{P}_i} \cdot (\mathbf{1}_k - \mathbf{P}_i)
\end{aligned}$$

where  $\mathbf{1}_k$  is an one-hot manner vector and  $k_{th}$  value is 1.

$$\begin{aligned}
\frac{\partial \mathcal{L}_{Firth}}{\partial r_i^k} &= \frac{1}{M} \sum_{i=1}^M \sum_{k=1}^C -\frac{\lambda}{(C+1)} \cdot \frac{p_i^k}{\mathbf{P}_i} \cdot (\mathbf{1}_k - \mathbf{P}_i) \\
&= \frac{1}{M} \sum_{i=1}^M \sum_{k=1}^C -\frac{\lambda}{(C+1)} (1 - C \cdot p_i^k) \quad . \quad (5) \\
&= \frac{1}{M} \sum_{i=1}^M \sum_{k=1}^C \frac{\lambda}{(C+1)} (C \cdot p_i^k - 1)
\end{aligned}$$

The gradient of  $\mathcal{L}$  with respect to  $r_i^k$  is

$$\frac{\partial \mathcal{L}}{\partial r_i^k} = \frac{1}{M} \sum_{i=1}^M \sum_{k=1}^C \left[ (p_i^k - y_i^k) + \frac{\lambda}{(C+1)} (C \cdot p_i^k - 1) \right]. \quad (6)$$

The gradients of  $\mathcal{L}$  with respect to  $\mathbf{r}_i = \{r_i^k\}_{k=1}^C$  is

$$\frac{\partial \mathcal{L}}{\partial \mathbf{r}_i} = \frac{1}{M} \sum_{i=1}^M \left[ (\mathbf{P}_i - \mathbf{y}_i) + \frac{\lambda}{(C+1)} (C\mathbf{P}_i - \mathbf{E}) \right], \quad (7)$$

where  $\mathbf{E}$  is a one-full vector with the same size as  $\mathbf{P}_i$ . As given in Eq. 6, we found that when  $\mathbf{y}_i = \mathbf{1}_c$  (i.e.,  $\mathbf{x}_i$  belongs to class  $c$ ) and  $\lambda > 0$ :

$$\begin{cases} \lambda(C \cdot p_i^k - 1) < 0, & k \neq c \\ \lambda(C \cdot p_i^k - 1) > 0, & k = c \end{cases} \quad (8)$$

because  $p_i^c$  is usually larger than  $\frac{1}{C}$  and other logit ( $\{p_i^k\}_{k \neq c}$ ) is usually smaller than  $\frac{1}{C}$ . In other words, FBR increases the gradients with respect to  $r_i^c$  and decreases other gradients to strengthen the influence of  $\mathbf{y}_i$  to the trained model.

## B THE ANALYTIC GRADIENTS OF LP-FT-FB

We give the analytic formula of LP-FT-FB as follows. The gradients of linear classifier in LP are

$$\begin{aligned}
\beta' &= \beta + \alpha_1 \cdot \frac{\partial \mathcal{L}(\hat{\mathbf{y}}, \mathbf{y})}{\partial \mathbf{r}} \cdot \frac{\partial \mathbf{r}}{\partial \beta} \\
&= \beta + \frac{\alpha_1}{K \cdot C_{few}} \cdot \sum_{i=1}^{K \cdot C_{few}} \frac{\partial \mathcal{L}(\hat{\mathbf{y}}_i, \mathbf{y}_i)}{\partial \mathbf{r}_i} \cdot \frac{\partial \mathbf{r}_i}{\partial \beta} \quad . \quad (9) \\
&= \beta + \frac{\alpha_1}{K \cdot C_{few}} \cdot \sum_{i=1}^{K \cdot C_{few}} \left[ (\hat{\mathbf{y}}_i - \mathbf{y}_i) + \frac{\lambda}{C_{few} + 1} \cdot (C_{few} \hat{\mathbf{y}}_i - \mathbf{E}) \right] \cdot \frac{\partial \mathbf{r}_i}{\partial \beta}
\end{aligned}$$

Then, at the FT stage, the gradients of feature extractor are

$$\begin{aligned}
\hat{\theta} &= \theta_0 + \frac{\partial \mathcal{L}(\hat{\mathbf{y}}', \mathbf{y})}{\partial \mathbf{r}'} \cdot \frac{\partial \mathbf{r}'}{\partial \theta_0} \\
&= \theta_0 + \frac{\alpha_2}{K \cdot C_{few}} \cdot \sum_{i=1}^{K \cdot C_{few}} \frac{\partial \mathcal{L}(\hat{\mathbf{y}}'_i, \mathbf{y}_i)}{\partial \mathbf{r}'_i} \cdot \frac{\partial \mathbf{r}'_i}{\partial \theta_0} \\
&= \theta_0 + \frac{\alpha_2}{K \cdot C_{few}} \cdot \sum_{i=1}^{K \cdot C_{few}} \left[ (\hat{\mathbf{y}}'_i - \mathbf{y}_i) + \frac{\lambda_{inv}}{C_{few} + 1} \cdot (C_{few} \hat{\mathbf{y}}'_i - \mathbf{E}) \right] \cdot \frac{\partial \mathbf{r}'_i}{\partial \theta_0}
\end{aligned} \tag{10}$$

The gradients of linear classifier in FT are

$$\begin{aligned}
\hat{\beta} &= \beta' + \alpha_2 \cdot \frac{\partial \mathcal{L}(\hat{\mathbf{y}}', \mathbf{y})}{\partial \mathbf{r}'} \cdot \frac{\partial \mathbf{r}'}{\partial \beta'} \\
&= \beta' + \frac{\alpha_2}{K \cdot C_{few}} \cdot \sum_{i=1}^{K \cdot C_{few}} \frac{\partial \mathcal{L}(\hat{\mathbf{y}}'_i, \mathbf{y}_i)}{\partial \mathbf{r}'_i} \cdot \frac{\partial \mathbf{r}'_i}{\partial \beta'} \\
&= \beta' + \frac{\alpha_2}{K \cdot C_{few}} \cdot \sum_{i=1}^{K \cdot C_{few}} \left[ (\hat{\mathbf{y}}'_i - \mathbf{y}_i) + \frac{\lambda_{inv}}{C_{few} + 1} \cdot (C_{few} \hat{\mathbf{y}}'_i - \mathbf{E}) \right] \cdot \frac{\partial \mathbf{r}'_i}{\partial \beta'}
\end{aligned} \tag{11}$$

## C ALGORITHM

We give the whole flow as follows for a better understanding of the proposed method and reproducing it.

---

### Algorithm 1 LP-FT-FB

---

**Require:**  $\mathcal{D} = \{(\mathbf{x}_i, \mathbf{y}_i)\}_{1 \leq i \leq M}$ , Episodic Sampler Operator (ES), pre-trained  $\mathbf{B}_0(\cdot, \theta_0)$ ,  $\lambda$ ,  $\lambda_{inv}$ ,  $\alpha_1$ , and  $\alpha_2$ ;

- 1: **for**  $1 \leq p \leq P$  **do**
- 2:    $\mathcal{T}_p = ES(\mathcal{D}) = \{(\mathbf{x}_i, \mathbf{y}_i)\}_{i=1}^{K \cdot C_{few}}$  for  $C_{few}$ -way-K-shot FSL tasks;
- 3:    $\mathbf{z} = \mathbf{B}_0(\mathbf{x}, \theta_0)$ ;
- 4:   Initialize randomly a linear classifier  $\mathbf{v}(\cdot, \beta)$ ;
- 5:    $\mathbf{r} = \beta \cdot \mathbf{z}$ ,  $\hat{\mathbf{y}} = \mathbf{v}(\mathbf{z}, \beta)$ ;
- 6:   **LP:**  $\mathcal{L}(\hat{\mathbf{y}}, \mathbf{y}) = \frac{1}{C_{few} \cdot K} \sum_{i=1}^{K \cdot C_{few}} \mathcal{L}(\hat{\mathbf{y}}_i, \mathbf{y}_i)$ ;
- 7:    $\mathbf{v}(\cdot, \beta)$  is updated by Eq. 9 to obtain  $\mathbf{v}'(\cdot, \beta')$ ;
- 8:    $\hat{\mathbf{y}}'$  is computed;
- 9:   **FT:** The loss of FT is computed;
- 10:   The feature extractor  $\mathbf{B}_0(\cdot, \theta_0)$  is updated by Eq. 10 to obtain  $\hat{\mathbf{B}}(\cdot, \hat{\theta})$ ;
- 11:   The classifier is updated by Eq. 11 to obtain  $\hat{\mathbf{v}}(\cdot, \hat{\beta})$ ;
- 12:   **Output:**  $\{\hat{\mathbf{B}}(\cdot, \hat{\theta}), \hat{\mathbf{v}}(\cdot, \hat{\beta})\}$ ;
- 13:   **Evaluated by on Output on test samples**
- 14: **end for**

---

## D EXTRA EXPERIMENTS

### D.1 CROSS-DOMAIN RESULTS

Besides the cross-domain tasks with DC Yang et al. (2021), we also give some experimental results without DC to show the equivariance brought by LP-FT-FB. The evaluated tasks are 5-way tasks. As given in Table 1, LP-FT-FB outperforms S2M2 by a large margin. This verifies the equivariance adapting the novel features to target domain.

Table 1: 5-way experiments for cross-domain FSL tasks.

| Methods                   | <i>mini</i> -Imagenet $\rightarrow$ CUB |              | <i>tiered</i> -Imagenet $\rightarrow$ CUB |              |
|---------------------------|-----------------------------------------|--------------|-------------------------------------------|--------------|
|                           | 1-shot                                  | 5-shot       | 1-shot                                    | 5-shot       |
| S2M2 Mangla et al. (2020) | 48.24                                   | 70.44        | 72.46                                     | 88.02        |
| LP-FT-FB                  | <b>50.47</b>                            | <b>71.62</b> | <b>74.56</b>                              | <b>89.42</b> |

## D.2 EXPERIMENTS ON 2-LAYER MLP

We added experiments with a 2-layer-MLP linear layer. The results are given as follows. The experimental settings: we add a fully-connected layer and a ReLU layer before the cosine normalized layer Chen et al. (2019). The added fully-connected layer contains  $d \times d$  weight parameters without bias.  $d$  is the length of the extracted features. The experiments are conducted on *mini*-Imagenet for the 5-way-1-shot task. The 2-layer MLP improved the performance of FBR by 0.2%. And the proposed LP-FT-FB outperforms it by 1.38%. It still works well.

Table 2: The experiments on 2-layer MLP.

| Method                     | 5-way-1-shot |
|----------------------------|--------------|
| FBR Ghaffari et al. (2022) | 65.59        |
| LP-FT-FB                   | 67.04        |
| FBR + 2-layer-MLP          | 65.80        |
| LP-FT-FB + 2-layer-MLP     | 67.18        |

## E RELATED META-LEARNING-BASED METHODS

The meta-learning FSL methods used meta-learning methods to learn the learning patterns of the models from different N-way-K-shot tasks instead of learning the pattern of the target tasks. It can be viewed as a special regularization method to avoid the learned models being over-fitted on the pre-training samples. The learning patterns contain the gradients for updating the models and the metrics of the responding features, i.e., gradient-based and metric-based methods.

The gradient-based methods are original from Model-Agnostic Meta-Learning (MAML) Finn et al. (2017). MAML learned second-order gradients to update the pre-trained model for each task. Following MAML, Nichol *et al.* proposed Reptile Nichol et al. (2018) to use the learned first-order gradients to approximate the second-order gradients to avoid complex computation of Hessian matrices. Song *et al.* proposed using Evolution Strategies Song et al. (2020) to obtain an algorithm, which avoids the problem of estimating second derivatives for solving the complex computation problem.

However, gradient-based methods are at high computation costs, Snell proposed Prototypical Networks Snell et al. (2017) to use Euclidean distance to replace the linear classifier, which is over-sensitive to the base samples. Then sung *et al.* proposed Relation Networks Sung et al. (2018) to improve the distance by learning the similarity between the support and query features. Recently, Zhang *et al.* proposed a variational method Zhang et al. (2019) to address the biased point estimation problem of metric-based methods.

## REFERENCES

- Wei-Yu Chen, Yen-Cheng Liu, Zsolt Kira, Yu-Chiang Wang, and Jia-Bin Huang. A closer look at few-shot classification. In *International Conference on Learning Representations*, 2019.
- Chelsea Finn, Pieter Abbeel, and Sergey Levine. Model-Agnostic Meta-Learning for Fast Adaptation of Deep Networks. 2017. URL <http://arxiv.org/abs/1703.03400>.
- Saba Ghaffari, Ehsan Saleh, David Forsyth, and Yu-Xiong Wang. On the importance of firth bias reduction in few-shot classification. In *International Conference on Learning Representations*, 2022. URL <https://openreview.net/forum?id=DNRADop4ksB>.

- Puneet Mangla, Nupur Kumari, Abhishek Sinha, Mayank Singh, Balaji Krishnamurthy, and Vineeth N Balasubramanian. Charting the right manifold: Manifold mixup for few-shot learning. In *The IEEE Winter Conference on Applications of Computer Vision*, pp. 2218–2227, 2020.
- Alex Nichol, Joshua Achiam, and J. Schulman. On first-order meta-learning algorithms. *ArXiv*, abs/1803.02999, 2018.
- Jake Snell, Kevin Swersky, and Richard Zemel. Prototypical networks for few-shot learning. In *Advances in Neural Information Processing Systems*, volume 30, 2017. URL <https://proceedings.neurips.cc/paper/2017/file/cb8da6767461f2812ae4290eac7cbc42-Paper.pdf>.
- Xingyou Song, Wenbo Gao, Yuxiang Yang, Krzysztof Choromanski, Aldo Pacchiano, and Yunhao Tang. Es-maml: Simple hessian-free meta learning. In *International Conference on Learning Representations*, 2020. URL <https://openreview.net/forum?id=SlEXA2NtDB>.
- Flood Sung, Yongxin Yang, Li Zhang, Tao Xiang, Philip HS Torr, and Timothy M Hospedales. Learning to compare: Relation network for few-shot learning. In *Proceedings of the IEEE Conference on Computer Vision and Pattern Recognition*, 2018.
- Shuo Yang, Lu Liu, and Min Xu. Free lunch for few-shot learning: Distribution calibration. In *International Conference on Learning Representations*, 2021. URL <https://openreview.net/forum?id=JWOiYxMG92s>.
- Jian Zhang, Chenglong Zhao, Bingbing Ni, Minghao Xu, and Xiaokang Yang. Variational few-shot learning. In *2019 IEEE/CVF International Conference on Computer Vision (ICCV)*, pp. 1685–1694, 2019. doi: 10.1109/ICCV.2019.00177.
